# Supplementary material for: Assessment of Corrosion Performance of Steel Rebar in Snail Shell Ash Blended Cements under Marine Environments
Source: MDPI journal article supplement (doi:10.3390/ma14237286), 2021-11-28
Supplement: s1 [file s1]

# Assessment of Corrosion Performance of Steel Rebar in SSA Blended Cements under Marine Environments

Raghav Muralidharan <sup>1</sup>, Karthick Subbiah <sup>2\*</sup>, Taejoon Park<sup>3</sup> and Han-Seung Lee<sup>4\*</sup>

<sup>1</sup> Department of Civil Engineering, PSG Institute of Technology and Applied Research, Neelambur, Coimbatore 641 062, India; raghav09psgitech@gmail.com

<sup>2</sup> Department of Architectural Engineering, Hanyang University, , 55 Hanyangdaehak-ro, Sangrok-gu, Gyeonggi-do, Ansan-si 15588, Korea

<sup>3</sup> Department of Robotics Engineering, Hanyang University, 55 Hanyangdaehak-ro, Gyeonggi-do, Ansan-si 15588, Korea; taejoon@hanyang.ac.kr

\* Correspondence: karthick.chemistry@gmail.com (K.S.); ercleehs@hanyang.ac.kr (H.-S.L.); Tel.: +82-31-436-8159 (H.-S.L.); Fax: +82-31-436-8169 (H.-S.L.)

**Citation:** Raghav, M.; Karthick, S.; Park, T.; Lee, H.-S. Assessment of Corrosion Performance of Steel Rebar in SSA Blended Cements under Marine Environments. *Materials* **2021**, *14*, 7286.  
<https://doi.org/10.3390/ma14237286>

Academic Editor: Frank Collins

Received: 28 October 2021

Accepted: 24 November 2021

Published: 28 November 2021

**Publisher's Note:** MDPI stays neutral with regard to jurisdictional claims in published maps and institutional affiliations.

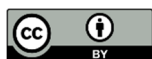

**Copyright:** © 2021 by the authors. Licensee MDPI, Basel, Switzerland. This article is an open access article distributed under the terms and conditions of the Creative Commons Attribution (CC BY) license (<http://creativecommons.org/licenses/by/4.0/>).

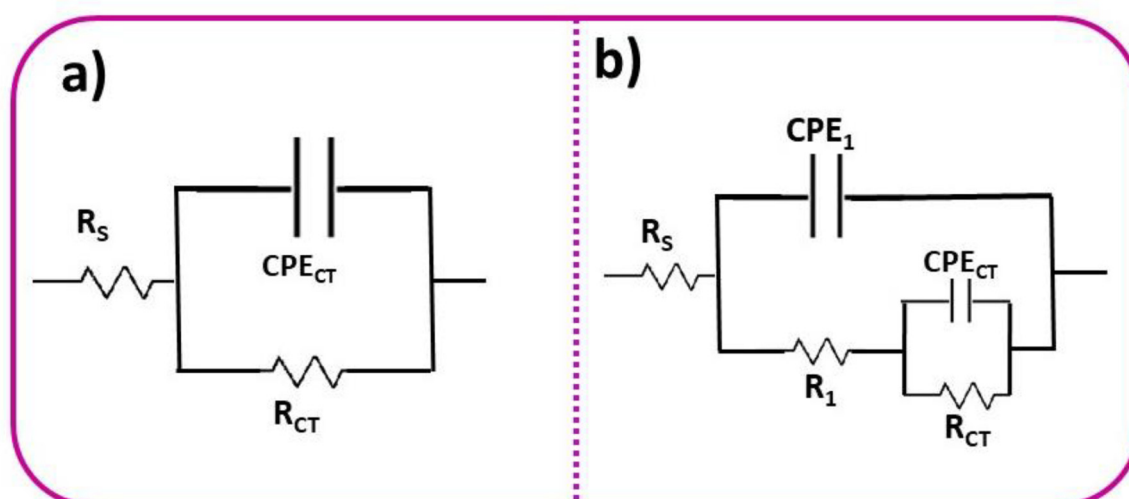

**Figure S1.** Equivalent circuit model fit for EIS analysis of the steel rebar immersed in chloride contaminated 30 various cement extracts for an exposure period of 1 day (a); 15 days and 30 days (b).

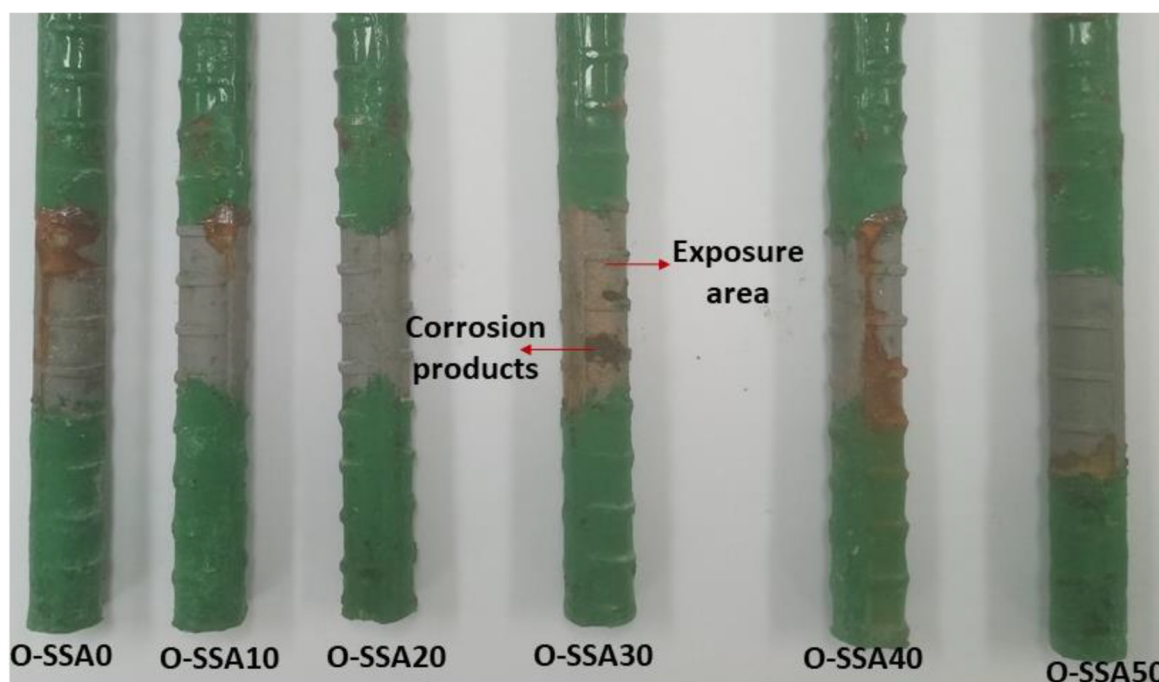

**Figure S2.** Photographic image of steel rebars immersed in chloride contaminated various cement extracts 35 after exposure periods of 30 days.

**Table S1.** Compressive strength at different curing periods (days).

| System  | Compressive Strength with Different Curing Days<br>(N/mm <sup>2</sup> ) |        |        |         |         |
|---------|-------------------------------------------------------------------------|--------|--------|---------|---------|
|         | 1 day                                                                   | 3 days | 7 days | 14 days | 28 days |
| O-SSA0  | 17.12                                                                   | 20.74  | 29.98  | 33.18   | 37.30   |
| O-SSA10 | 15.60                                                                   | 19.25  | 29.88  | 33.58   | 38.57   |
| O-SSA20 | 16.41                                                                   | 20.15  | 30.12  | 34.56   | 40.00   |
| O-SSA30 | 15.32                                                                   | 18.78  | 28.56  | 32.85   | 39.15   |
| O-SSA40 | 11.25                                                                   | 13.86  | 23.48  | 28.67   | 35.03   |
| O-SSA50 | 9.75                                                                    | 12.55  | 22.59  | 27.35   | 33.12   |

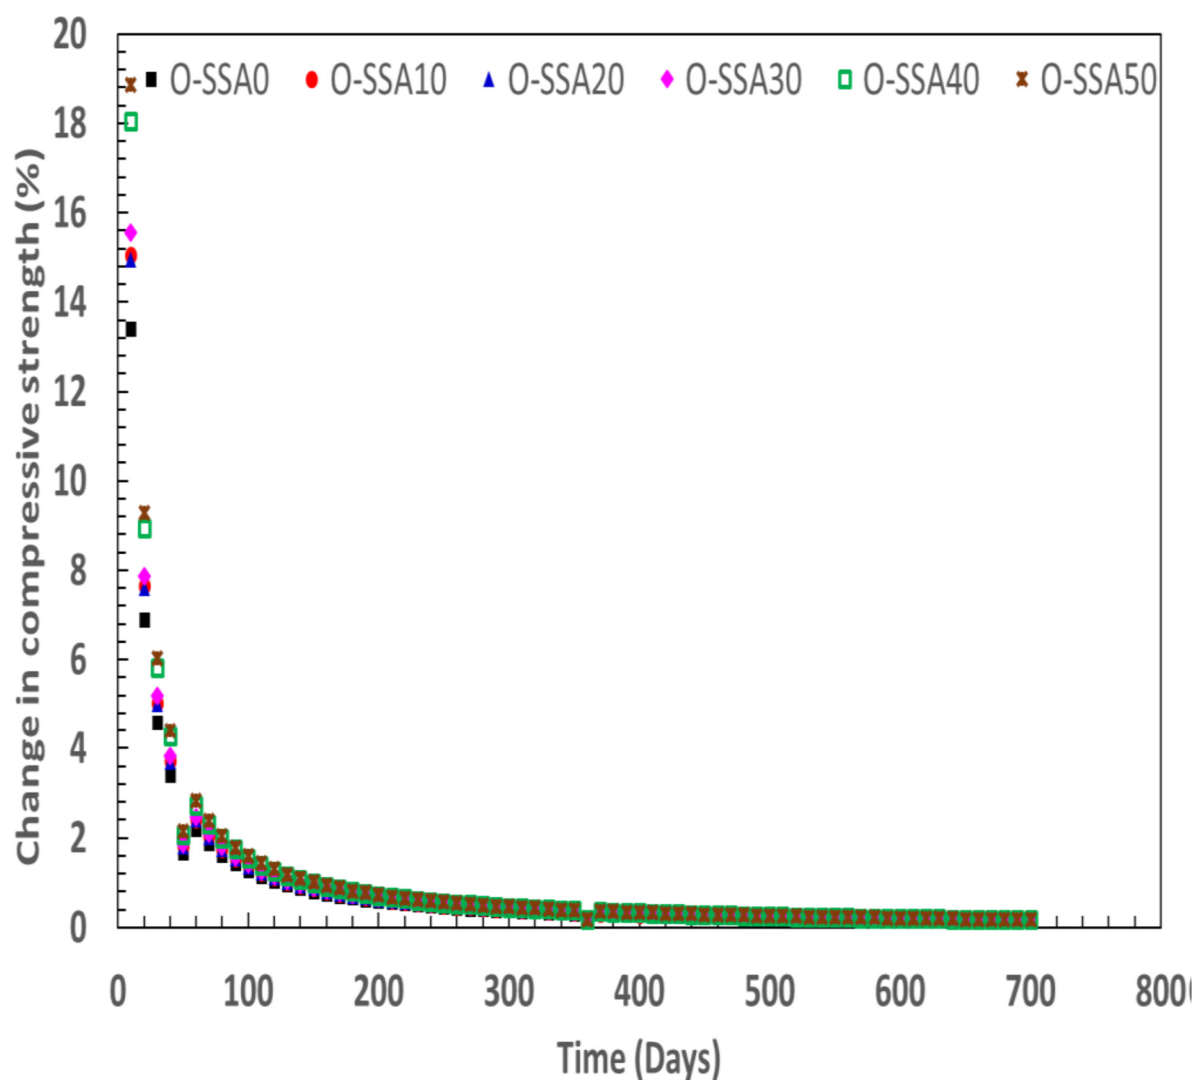

**Figure S3.** Change in compressive strength vs. Time (Days) (Extrapolation modelling).

**Table S2.** Change in compressive strength vs. Time (days).

| Days | Change in Compressive Strength (%) |          |          |          |          |          |
|------|------------------------------------|----------|----------|----------|----------|----------|
|      | O-SSA0                             | O-SSA10  | O-SSA20  | O-SSA30  | O-SSA40  | O-SSA50  |
| 10   | 13.39395                           | 15.04759 | 14.95845 | 15.55901 | 18.04439 | 18.85671 |
| 20   | 6.909501                           | 7.650986 | 7.611562 | 7.876009 | 8.9418   | 9.280474 |
| 30   | 4.585532                           | 5.042648 | 5.018503 | 5.18013  | 5.823576 | 6.025414 |
| 40   | 3.400867                           | 3.723613 | 3.706636 | 3.820133 | 4.268535 | 4.40807  |
| 50   | 1.670402                           | 1.823234 | 1.815218 | 1.868755 | 2.079127 | 2.144223 |
| 60   | 2.212635                           | 2.40931  | 2.399018 | 2.467707 | 2.736514 | 2.819335 |
| 70   | 1.875181                           | 2.037939 | 2.029437 | 2.086145 | 2.307336 | 2.375253 |
| 80   | 1.623581                           | 1.761687 | 1.754484 | 1.802508 | 1.989314 | 2.046512 |
| 90   | 1.42914                            | 1.548601 | 1.542379 | 1.583849 | 1.744793 | 1.793954 |
| 100  | 1.274598                           | 1.379517 | 1.374058 | 1.410427 | 1.55129  | 1.594229 |
| 110  | 1.148972                           | 1.242263 | 1.237414 | 1.26971  | 1.394583 | 1.432578 |
| 120  | 1.044946                           | 1.128749 | 1.124397 | 1.153376 | 1.265247 | 1.299232 |
| 130  | 0.957464                           | 1.033394 | 1.029454 | 1.055683 | 1.1568   | 1.187473 |
| 140  | 0.882924                           | 0.952227 | 0.948633 | 0.972551 | 1.064639 | 1.092537 |
| 150  | 0.818692                           | 0.882347 | 0.879048 | 0.900998 | 0.985412 | 1.010955 |

|     |          |          |          |          |          |          |
|-----|----------|----------|----------|----------|----------|----------|
| 160 | 0.762798 | 0.821588 | 0.818543 | 0.8388   | 0.91662  | 0.940142 |
| 170 | 0.71374  | 0.768302 | 0.765477 | 0.784263 | 0.856363 | 0.878134 |
| 180 | 0.670356 | 0.72121  | 0.718579 | 0.736076 | 0.803172 | 0.823413 |
| 190 | 0.631728 | 0.679309 | 0.676848 | 0.693209 | 0.755894 | 0.774788 |
| 200 | 0.597128 | 0.641799 | 0.63949  | 0.654841 | 0.713612 | 0.731312 |
| 210 | 0.565964 | 0.608034 | 0.60586  | 0.62031  | 0.675587 | 0.692222 |
| 220 | 0.537758 | 0.57749  | 0.575438 | 0.589077 | 0.641219 | 0.656899 |
| 230 | 0.512114 | 0.549734 | 0.547791 | 0.560699 | 0.610013 | 0.624833 |
| 240 | 0.488703 | 0.524406 | 0.522564 | 0.534809 | 0.58156  | 0.595601 |
| 250 | 0.46725  | 0.501208 | 0.499456 | 0.511097 | 0.555517 | 0.56885  |
| 260 | 0.447522 | 0.479884 | 0.478215 | 0.489305 | 0.531596 | 0.544282 |
| 270 | 0.429324 | 0.460222 | 0.458628 | 0.469212 | 0.509552 | 0.521647 |
| 280 | 0.412486 | 0.442036 | 0.440513 | 0.45063  | 0.489177 | 0.500727 |
| 290 | 0.396863 | 0.425169 | 0.423711 | 0.433399 | 0.470291 | 0.48134  |
| 300 | 0.382332 | 0.409486 | 0.408087 | 0.417378 | 0.452739 | 0.463325 |
| 310 | 0.368782 | 0.394867 | 0.393523 | 0.402445 | 0.436388 | 0.446545 |
| 320 | 0.35612  | 0.38121  | 0.379918 | 0.388497 | 0.421121 | 0.430879 |
| 330 | 0.344262 | 0.368424 | 0.367181 | 0.37544  | 0.406835 | 0.416222 |
| 340 | 0.333135 | 0.356431 | 0.355232 | 0.363192 | 0.393441 | 0.40248  |
| 350 | 0.322675 | 0.345159 | 0.344002 | 0.351683 | 0.380858 | 0.389573 |
| 360 | 0.157483 | 0.168419 | 0.167856 | 0.171591 | 0.185772 | 0.190007 |
| 370 | 0.303531 | 0.324538 | 0.323458 | 0.330631 | 0.357854 | 0.365981 |
| 380 | 0.294752 | 0.315085 | 0.31404  | 0.320981 | 0.347316 | 0.355174 |
| 390 | 0.286445 | 0.306143 | 0.30513  | 0.311853 | 0.33735  | 0.344956 |
| 400 | 0.278573 | 0.297672 | 0.29669  | 0.303206 | 0.327913 | 0.335281 |
| 410 | 0.271105 | 0.289636 | 0.288684 | 0.295005 | 0.318965 | 0.326108 |
| 420 | 0.264009 | 0.282004 | 0.281079 | 0.287216 | 0.310469 | 0.317399 |
| 430 | 0.257261 | 0.274746 | 0.273847 | 0.279809 | 0.302392 | 0.309121 |
| 440 | 0.250834 | 0.267835 | 0.266962 | 0.272757 | 0.294705 | 0.301242 |
| 450 | 0.244707 | 0.261248 | 0.260399 | 0.266036 | 0.287381 | 0.293736 |
| 460 | 0.238859 | 0.254964 | 0.254137 | 0.259624 | 0.280394 | 0.286577 |
| 470 | 0.233273 | 0.248961 | 0.248155 | 0.2535   | 0.273723 | 0.279742 |
| 480 | 0.227931 | 0.243222 | 0.242437 | 0.247645 | 0.267347 | 0.273209 |
| 490 | 0.222818 | 0.23773  | 0.236964 | 0.242042 | 0.261248 | 0.26696  |
| 500 | 0.21792  | 0.232469 | 0.231722 | 0.236676 | 0.255407 | 0.260977 |
| 510 | 0.213224 | 0.227426 | 0.226697 | 0.231532 | 0.249809 | 0.255243 |
| 520 | 0.208717 | 0.222588 | 0.221876 | 0.226597 | 0.24444  | 0.249743 |
| 530 | 0.204389 | 0.217942 | 0.217247 | 0.221859 | 0.239286 | 0.244464 |
| 540 | 0.200229 | 0.213477 | 0.212798 | 0.217305 | 0.234334 | 0.239393 |
| 550 | 0.196228 | 0.209184 | 0.20852  | 0.212927 | 0.229574 | 0.234518 |
| 560 | 0.192378 | 0.205053 | 0.204403 | 0.208714 | 0.224994 | 0.229828 |
| 570 | 0.188669 | 0.201074 | 0.200438 | 0.204657 | 0.220584 | 0.225313 |
| 580 | 0.185094 | 0.19724  | 0.196617 | 0.200747 | 0.216336 | 0.220964 |
| 590 | 0.181647 | 0.193543 | 0.192933 | 0.196978 | 0.212241 | 0.216771 |
| 600 | 0.178321 | 0.189976 | 0.189379 | 0.193341 | 0.208291 | 0.212727 |
| 610 | 0.175109 | 0.186533 | 0.185947 | 0.18983  | 0.204478 | 0.208823 |
| 620 | 0.172006 | 0.183206 | 0.182632 | 0.186439 | 0.200795 | 0.205054 |
| 630 | 0.169006 | 0.179991 | 0.179429 | 0.183161 | 0.197237 | 0.201411 |
| 640 | 0.166105 | 0.176882 | 0.17633  | 0.179992 | 0.193797 | 0.19789  |
| 650 | 0.163298 | 0.173874 | 0.173332 | 0.176925 | 0.190469 | 0.194484 |
| 660 | 0.16058  | 0.170962 | 0.17043  | 0.173957 | 0.187248 | 0.191187 |

|     |          |          |          |          |          |          |
|-----|----------|----------|----------|----------|----------|----------|
| 670 | 0.157947 | 0.168142 | 0.16762  | 0.171082 | 0.184129 | 0.187995 |
| 680 | 0.155396 | 0.165409 | 0.164896 | 0.168296 | 0.181107 | 0.184903 |
| 690 | 0.152922 | 0.16276  | 0.162256 | 0.165596 | 0.178179 | 0.181906 |
| 700 | 0.150523 | 0.16019  | 0.159695 | 0.162977 | 0.175339 | 0.179    |

**Table S3.** Value of A, B, R2 and estimated corrosion rate from linear extrapolation (Equation:  $A \cdot NE + B$ ).

| % of Replacement | A      | B      | R2     | Corrosion Rate (mm/y)<br>after 365 Days Exposure |
|------------------|--------|--------|--------|--------------------------------------------------|
| O-SSA0           | 0.0009 | 0.0053 | 0.9979 | 0.3338                                           |
| O-SSA10          | 0.0007 | 0.0057 | 0.9986 | 0.2612                                           |
| O-SSA20          | 0.0006 | 0.0048 | 0.9747 | 0.2238                                           |
| O-SSA30          | 0.0009 | 0.0054 | 0.9973 | 0.3339                                           |
| O-SSA40          | 0.0009 | 0.0088 | 1.0000 | 0.3373                                           |
| O-SSA50          | 0.0016 | 0.0057 | 0.9583 | 0.5897                                           |

### 3.6. General Cost Estimation

Let us take 1 bag cement is 50 kg 61

If the replacement levels increase the consumption of cement in the formulation decreases as follows:

O-SSA10 ( $10\% \times 50$ ) = 5 kg

O-SSA20 ( $20\% \times 50$ ) = 10 kg

O-SSA30 ( $30\% \times 50$ ) = 15 kg

1 ton of cement  $\approx$  50 USD

O-SSA10 ( $10\% \times 50$ ) = 5 USD

O-SSA20 ( $20\% \times 50$ ) = 10 USD

O-SSA30 ( $30\% \times 50$ ) = 15 USD

SSA in concrete will save cost of 15 USD for the use of 1 ton of cement.
